# Supplementary material for: Emergence, Retention and Selection: A Trilogy of Origination for Functional De Novo Proteins from Ancestral LncRNAs in Primates
Source: PubMed Central journal article supplement (PMC4503675; doi:10.1371/journal.pgen.1005391), 2015-07-15
Supplement: pgen.1005391.s010.pdf [file pgen.1005391.s010.pdf]

**S2 Table. Evidence supporting the transcription and translation of *de novo* protein-coding genes in human**

| Gene ID                      | EST / mRNA | Iso-Seq | Peptides (ID)*                                  |
|------------------------------|------------|---------|-------------------------------------------------|
| ENSG00000136242              | 1          |         | MFMAAAAVAVGAARRPR (PXD000158)                   |
|                              |            |         | SPVSRKMFMAAAAVAVGAAR (PXD000158)                |
|                              |            |         | <u>GQGRGRTAGARARGAPWES (8476)</u>               |
|                              |            |         | <u>KMFMAAAAVAVGAAR (8653)</u>                   |
| ENSG00000162968              | 1          |         | APFKELATPLTCKQPPTLK (PXD000158)                 |
|                              |            |         | ELATPLTCKQPPTLKLIR (PXD000158)                  |
|                              |            |         | <u>VFHPKGLCCGR (8667)</u>                       |
|                              |            |         | <u>GLCCGRCS DPR (8667)</u>                      |
| ENSG00000175913              | 2          |         | AHTRTTQYTEQDSVVTAR (PXD000451)                  |
|                              |            |         | EGEGRCEQVALSSGPPGALHASR (PXD000036)             |
|                              |            |         | <u>PESIFVPTAQDGAQMVCK (PXD000158, 8670)</u>     |
|                              |            |         | PSTGETFVQSGRWDGGWR (PXD000158)                  |
|                              |            |         | PSTGETFVQSGRWDGGWRGAMK (PXD000158)              |
|                              |            |         | QASTPPTRPESIFVPTAQDGAQMVCK (PXD000343)          |
|                              |            |         | TTQYTEQDSVVTARGLLDAKR (PXD000158)               |
|                              |            |         | <u>TACNITAWGGFEGK (8670)</u>                    |
| <u>HRQASTPPTR (10281)</u>    |            |         |                                                 |
| ENSG00000176833              | 1          |         | ARSAAKLSQVCVTMCAFICV (PXD000158)                |
|                              |            |         | ASHSNPSELGGPHSAGFYELLR (PXD000158)              |
|                              |            |         | ASHSNPSELGGPHSAGFYELLRR (PXD000158)             |
|                              |            |         | MQMTQRSHHFLVWGGGGRK (PXD000158)                 |
|                              |            |         | <u>QSPINVQSDAGETEKGR (PXD000158, 673)</u>       |
|                              |            |         | <u>SAAKLSQVCVTMCAFICV (1624,8661,8664,8670)</u> |
| <u>LSQVCVTMCAFICV (8669)</u> |            |         |                                                 |
| ENSG00000176911              | 1          |         | KDVGWSLGIHPWSSGYPR (PXD000158)                  |
|                              |            |         | LCTCAQAPAAGVPSTAQLFMK (PXD000158)               |
|                              |            |         | LCTCAQAPAAGVPSTAQLFMKNR (PXD000158)             |
|                              |            |         | VKPRSPTNTHAHLELTLVK (PXD000158)                 |
|                              |            |         | <u>RNAEWHVHMEYYAAENMNNWSHGMNEAER (203)</u>      |
| ENSG00000180838              | 1          |         | PPTHGCARSSTAPPAGCSSPPAGSPR (PXD000158)          |
|                              |            |         | SSTAPPAGCSSPPAGSPR (PXD000158)                  |
|                              |            |         | SSTAPPAGCSSPPAGSPRCSPGLCR (PXD000158)           |
|                              |            |         | <u>CSPGLCRSSTAGQCLWGGVGGASEAAP (156)</u>        |
| ENSG00000187488              | 3          | 25      | <u>AQEV PALGTASSVAPAR (489)</u>                 |

|                 |   |                                                  |
|-----------------|---|--------------------------------------------------|
|                 |   | <u>KAPRSWDSATPSEMLCPF (8543)</u>                 |
|                 |   | IILEKMQSDDVLDGNRER (PXD000158)                   |
|                 |   | INMETSIIILEKMQSDDVLDGNR (PXD000036)              |
|                 |   | MGIGTGHTSMNKGK (PXD000158)                       |
|                 |   | MGIGTGHTSMNKGKDVTLLELSVEK (PXD000158, PXD000451) |
| ENSG00000196273 | 5 | MQSDDVLDGNRERSNER (PXD000158)                    |
|                 |   | YIKTGKSIQVEGTVR (PXD000158)                      |
|                 |   | <u>IILEKMQSDDVLDGNR (96, 97)</u>                 |
|                 |   | <u>IILEK (3651)</u>                              |
|                 |   | <u>MGIGTGHTSMNK (8660)</u>                       |
|                 |   | <u>SNERGRDSLSEK (9330)</u>                       |
| ENSG00000197916 | 1 | CAPSHPANVYFFVERVSLTMLPRLVLK (PXD000158)          |
|                 |   | PSSHLSLQSSWEHKCAPSHPANVYFFVER (PXD000158)        |
|                 |   | <u>QGLACGR (8666)</u>                            |
| ENSG00000204079 | 1 | GSHGSLGEAPWGKSVPGRTASR (PXD000158)               |
|                 |   | HQCSGDLEVRGSHGSLGEAPWGK (PXD000158)              |
|                 |   | SLISAWATYQDLISINK (PXD000158)                    |
|                 |   | SLISAWATYQDLISINKLKEK (PXD000158)                |
|                 |   | <u>HCMASGAVLNK (8668)</u>                        |
|                 |   | <u>MISVHCNLCPLGSSDPPASASQVAGITGVR (8669)</u>     |
| ENSG00000204292 | 2 | <u>MMLSIRVPGQPAALR (8668)</u>                    |
|                 |   | <u>RMMLSIR (8668)</u>                            |
| ENSG00000204380 | 3 | AIGWHTSAFSPDCSLELR (PXD000158)                   |
|                 |   | ILFSNAFLTLAHRQLIR (PXD000158)                    |
|                 |   | SAPGPVLSSSLHSPR (PXD000158)                      |
|                 |   | <u>RMVPPRPDSLTLGRSSYAS (8538)</u>                |
|                 |   | <u>DLGVSLFPFPRS (8658, 8670)</u>                 |
|                 |   | <u>SAPGPVLSSSLHSPRLLLLVFNTTYGHR (8670)</u>       |
| ENSG00000205373 | 1 | SLTSEDAGAGLAGALAASSRQPRKLGRCRQD (8543)           |
|                 |   | VPLFRISLTSEDAGAGLAGALAASSR (86628670)            |
|                 |   | MTATLGSRGAAPGGSANSHGPS DPR (86628670)            |
|                 |   | <u>LPSEAGAGGASPSR (8672)</u>                     |
| ENSG00000205557 | 1 | VGVLGHLWPVTKVTR (PXD000158)                      |
|                 |   | <u>SLVTL SAHQGR (8663)</u>                       |
| ENSG00000205965 | 1 | MIGNMKTARPGWSSGK (PXD000158)                     |
|                 |   | MWWHLCTHSAVHPPTPSSFK (PXD000158)                 |
|                 |   | RSPAPPASPPGGR (PXD000158)                        |
|                 |   | <u>PLSLWVGLGNWRGGR (8660, 8665)</u>              |
| ENSG00000206028 | 2 | EGDQPPGGAQSSAGLGLVR (PXD000158)                  |
|                 |   | PGPVSDLTANMGQSGTSVYR (PXD000158)                 |
|                 |   | PGPVSDLTANMGQSGTSVYRASSPR (PXD000158)            |

|                 |   |   |                                                        |
|-----------------|---|---|--------------------------------------------------------|
|                 |   |   | SEHSTSGQTSADTHRSR (PXD000158)                          |
|                 |   |   | <u>AIPCLRPGPVDSDLTANMGQQSGTSVYR (8666)</u>             |
|                 |   |   | <u>DVILRVQPPTSTGPPLPPLSLVNR (8670)</u>                 |
|                 |   |   | <u>PTGLHTHVPEISLVPPTPSGNQTSAHRR (8671)</u>             |
|                 |   |   | <u>VQPPTSTGPPLPPLSLVNR (8671)</u>                      |
| ENSG00000206096 | 1 |   | MRTVFPLPQVGHRRP (PXD000158)                            |
|                 |   |   | QNPSEEMVASVQDTNQHGNLHYR (PXD000158)                    |
|                 |   |   | VVCSSQLSFFLVTSPSPLGR (PXD000158)                       |
|                 |   |   | <u>TVFPLPQVGH (8667)</u>                               |
|                 |   |   | <u>QNPSEEMVASVQDTNQHGNLHYRMR (8667, 8668)</u>          |
|                 |   |   | AGGQGTETLEASREK (PXD000158)                            |
|                 |   |   | GQKSLIQSQGQALRLK (PXD000158, 1904)                     |
|                 |   |   | <u>KSQMLEDASSMLQSSEK (PXD000158, 8659, 8668, 8669)</u> |
| ENSG00000206110 | 1 |   | LGRGQKSLIQSQGQALR (PXD000158)                          |
|                 |   |   | MFFSIQLHGETFPGFSPR (PXD000158)                         |
|                 |   |   | SQMLEDASSMLQSSEKWL (PXD000158)                         |
|                 |   |   | WRAGGQGTETLEASR (PXD000158)                            |
|                 |   |   | WRAGGQGTETLEASREK (PXD000158)                          |
|                 |   |   | CSWHPECVSGQALVKEALAGTR (PXD000158)                     |
|                 |   |   | DMTSTLRFHPQSTQMR (PXD000158)                           |
|                 |   |   | DMTSTLRFHPQSTQMRR (PXD000158)                          |
|                 |   |   | EALAGTRDMTSTLRFHPQSTQMR (PXD000158)                    |
|                 |   |   | MGRCSWHPECVSGQALVKEALAGTR (PXD000158)                  |
|                 |   |   | RVSPGAPPCPTPLGGILSR (PXD000158)                        |
| ENSG00000206113 | 1 |   | RVSPGAPPCPTPLGGILSREMGPSPR (PXD000158)                 |
|                 |   |   | VSPGAPPCPTPLGGILSR (PXD000158)                         |
|                 |   |   | VSPGAPPCPTPLGGILSREMGPSPR (PXD000158)                  |
|                 |   |   | VSPGAPPCPTPLGGILSREMGPSPRR (PXD000158)                 |
|                 |   |   | <u>MGRCSWHPECVSGQALV (3268)</u>                        |
|                 |   |   | <u>EMGPSPR (8653)</u>                                  |
|                 |   |   | <u>GLPVTWSQLPPR (8653)</u>                             |
| ENSG00000212693 | 1 |   | <u>YPSSGLVSMTGFGDVPDHMKWFMFR (8234)</u>                |
|                 |   |   | <u>CILHLCLPLTECFACASR (8669)</u>                       |
|                 |   |   | <u>VCOLYMHSSLNILGFMTDIEIITOMCLTAK (8670)</u>           |
| ENSG00000214780 | 2 |   | EGKGLVQSHTGTLWAGPLQEGTQGQT (PXD000158)                 |
|                 |   |   | GLVQSHTGTLWAGPLQEGTQGQT (PXD000158)                    |
|                 |   |   | <u>LRREGKGLVQSHTGTLWAGPL (8538)</u>                    |
| ENSG00000218478 | 3 | 4 | <u>MYFCGLGVRWGWGR (8667,8664,8667)</u>                 |
|                 |   |   | <u>VLSTDPAAHPCAVR (8667)</u>                           |
| ENSG00000223857 | 2 | 5 | AEVGGGPASEEYARRLAGCCPR (PXD000158)                     |
|                 |   |   | ARDSGLASGTRAEVGGGPASEEYAR (PXD000158)                  |

|                 |   |   |                                                   |
|-----------------|---|---|---------------------------------------------------|
|                 |   |   | DSGLASGTRAEVGGGPASEEYAR (PXD000158)               |
|                 |   |   | GSLPSPPAFPPGIATR (PXD000158)                      |
|                 |   |   | PWPLDRGSLPSPPAFPPGIATRATR (PXD000158)             |
|                 |   |   | SACRARDSGLASGTR (PXD000158)                       |
|                 |   |   | <u>MSGGHSSPEPPR (8653)</u>                        |
|                 |   |   | ESLVSRLRTQGTHLGLER (PXD000158)                    |
|                 |   |   | GWAGRVSLSLGMGTASPGSR (PXD000158, 8662)            |
|                 |   |   | VEGGDAVLRWSSAFSLPQSPGR (PXD000158)                |
| ENSG00000224013 | 4 | 2 | YGSVCGFCNKGWAGR (PXD000158)                       |
|                 |   |   | <u>LTGLMAGDR (2026)</u>                           |
|                 |   |   | <u>TQGTHLGLER (8653)</u>                          |
|                 |   |   | <u>GGEPPGPPRESLVSRL (8660)</u>                    |
|                 |   |   | <u>VSLGMGTASPGSRGGEPPGPPR (8670)</u>              |
|                 |   |   | AGKSGWLGCSSSLANSLLTSFFAHFVTK (PXD000158)          |
| ENSG00000225021 | 1 |   | HTLASSLLISVGHSTK (PXD000158, 8669)                |
|                 |   |   | MNSLTVMRVWDHSSSVYLEPTSTGTVRQPAISWIYSK (PXD000158) |
|                 |   |   | VWDHSSSVYLEPTSTGTVR (PXD000158)                   |
|                 |   |   | AEKETRSQCECALSNQLK (PXD000158)                    |
|                 |   |   | EDSLSHLSGAGCLFSLDIR (PXD000158)                   |
|                 |   |   | EDSLSHLSGAGCLFSLDIRLQGLWLLDSR (PXD000158)         |
| ENSG00000225860 | 1 |   | MPQWLVASIIPGCVCESVSR (PXD000158)                  |
|                 |   |   | SQCECALSNQLKARLGTNR (PXD000158)                   |
|                 |   |   | TCTNGLPGPSGLQPPTK (PXD000158)                     |
|                 |   |   | VCAVGLPDSEASGLGLR (PXD000158)                     |
|                 |   |   | <u>LQGLWLLDSRTCTNGLPGPSGLQPPTK (8665)</u>         |
|                 |   |   | MQPGCAVPQSGRLRGSSR (PXD000036, PXD000158)         |
|                 |   |   | QPLATTVSLLCRFTWGWTSPPQLWR (PXD000036)             |
|                 |   |   | ELGQLHNRWGRAGEGPR (PXD000036)                     |
|                 |   |   | FTWGWTSPPQLWRVTPQRAWCR (PXD000036)                |
|                 |   |   | GSSRGPGRSGPGMAAAGGSSAVEPR (PXD000036, PXD000158)  |
|                 |   |   | SGPGMAAAGGSSAVEPRRGRHHR (PXD000079)               |
|                 |   |   | SVLWQFPKHLGKKEGQLHNR (PXD000079)                  |
| ENSG00000225917 | 4 |   | AGAARQVLALLARPRRR (PXD000079)                     |
|                 |   |   | GSSRGPGRSGPGMAAAGGSSA (PXD000079)                 |
|                 |   |   | GPGRSGPGMAAAGGSSAVEPRR (PXD000158, PXD000451)     |
|                 |   |   | GWRAGGLSTLSFGTGVR (PXD000158)                     |
|                 |   |   | <u>SGPGMAAAGGSSAVEPRR (PXD000158, 8670)</u>       |
|                 |   |   | CPQSARCPAVRSGPLLQTR (PXD000158)                   |
|                 |   |   | SGPLLQTRCPECAGAAR (PXD000451)                     |
|                 |   |   | <u>MQPGCAVPQSGR (8670)</u>                        |
| ENSG00000230294 | 2 |   | EWSSCLHQASLLWRK (PXD000158)                       |

|                 |   |    |                                                                 |
|-----------------|---|----|-----------------------------------------------------------------|
|                 |   |    | GPQAVAGWGDAPALSWSLPR (PXD000158)                                |
|                 |   |    | HLLFSLTCSLMTARLLDMVPR (PXD000158)                               |
|                 |   |    | KHLLFSLTCSLMTAR (PXD000158)                                     |
|                 |   |    | TLSQGPYSQYPSPHHL (PXD000158)                                    |
|                 |   |    | WLLLPHEGHSPAQAPR (PXD000158)                                    |
|                 |   |    | <u>AAQCMCWLHRDVPYER (8653)</u>                                  |
|                 |   |    | <u>MTSNLGSPGPQR (8653)</u>                                      |
|                 |   |    | GNPSLPAPPQPMRR (PXD000158)                                      |
| ENSG00000235766 | 2 | 21 | GNPSLPAPPQPMRRLTFGPGPAPASDR (PXD000158)                         |
|                 |   |    | RLTFGPGPAPASDRP (PXD000158)                                     |
|                 |   |    | <u>TLPASPSAGTPLWGAGHVLGDAGESPLPSHPCPNR (21)</u>                 |
|                 |   |    | AGTGWGQAGLAGSCADPPR (PXD000158)                                 |
|                 |   |    | MGAQSGPLPQTEPWPLK (PXD000158)                                   |
|                 |   |    | PGAPPSTHINKERDSFR (PXD000158)                                   |
|                 |   |    | STQQGFKVSNWFGTQPGPPKETK (PXD000158)                             |
| ENSG00000236314 | 3 |    | VDSEAAAPPAASVSSQAR (PXD000158)                                  |
|                 |   |    | VPWEAVGLAVAAVSCSQASPASPGSRR (PXD000158)                         |
|                 |   |    | VSNWFGTQPGPPKETKAGTGWGQAGLAGSCADPPR (PXD000158)                 |
|                 |   |    | <u>RPGAPPSTHINK (23)</u>                                        |
|                 |   |    | <u>AGTGWGQAGLAGSCADPPRVPWEAVGLAVAAVSCSQASPASPGSRR (338)</u>     |
|                 |   |    | <u>VDSEAAAPPAASVSSQARSQAR (8657,8662)</u>                       |
| ENSG00000205056 | 3 |    | FSKLLLKILFYISIFS (PXD000079)                                    |
|                 |   |    | ILFYISIFSYPELMCEQYVTFIKPGIHYGQVSKK (PXD0000451)                 |
|                 |   |    | <u>EQSQKPCSNNGPAAAGEGR (PXD000158, 8663)</u>                    |
|                 |   |    | HTDPNFPNSNAVGTSSGWN (PXD000158)                                 |
|                 |   |    | <u>IGTGCSHTWDWR (8661,8664)</u>                                 |
| ENSG00000178803 | 3 |    | <u>MEQDWQPGEEVTPGPEPCSK (8663)</u>                              |
|                 |   |    | <u>PCSNNGPAAAGEGR (69,73,74,75,76,8653,8661,8664,8667)</u>      |
|                 |   |    | <u>PCSNNGPAAAGEGRVLPSPCFPWSTCQAAIHK (8663)</u>                  |
|                 |   |    | <u>WQGCTRPALLAPSLATLK (8668,8672)</u>                           |
|                 |   |    | NPHSWGIIKAHGLRPPWAPR (PXD000158)                                |
|                 |   |    | RTHSDTQATGWPPPQR (PXD000158)                                    |
|                 |   |    | SCPPSLCGGAAQTGDPVALPHGPEK (PXD000079)                           |
| ENSG00000204626 | 1 |    | THSDTQATGWPPPQR (PXD000158)                                     |
|                 |   |    | WVWGGGLSPRNPHSWGIIK (PXD000158)                                 |
|                 |   |    | <u>WQGCTRPALLAPSLATLK (8668; 8672)</u>                          |
|                 |   |    | <u>NPHSWGIIKAHGLR (8670a)</u>                                   |
|                 |   |    | <u>LERCMVPESEWAPWQPQLPCEPK (8670b)</u>                          |
| ENSG00000198547 | 6 |    | AMGGMPRMGTVDGDFGQALSSLAWTSTCFQDFCLPSLPGK (PXD000036, PXD000158) |
|                 |   |    | ATSVLAGLTAHLWDLGGGAGRRTSK (PXD000036, PXD000158)                |

|                 |     |   |                                                        |
|-----------------|-----|---|--------------------------------------------------------|
|                 |     |   | GDFGQALSSSLAWTSTCFQDFCLPSLPGK (PXD000079)              |
|                 |     |   | GRAMGGMPRMGTVGDFGQALSSSLAWTSTCFQDFCLPSLPGK (PXD000036) |
|                 |     |   | IWVGEGWGEVGGRLRSKVGR (PXD000036)                       |
|                 |     |   | LAGLTAHLWDLGGGAGR (PXD000079)                          |
|                 |     |   | LASFPFTKTGMLSRATSVLAGLTAHLWDLGGGAGR (PXD000451)        |
|                 |     |   | LPAPLISKQQFLSNSSR (PXD000451)                          |
|                 |     |   | MFPRPVLNSRAQAILLPQPPNMLDHR (PXD000451)                 |
|                 |     |   | PNMLDHRQWPPRLASFPFTK (PXD000079)                       |
|                 |     |   | PVLNSRAQAILLPQPPNMLDHR (PXD000036)                     |
|                 |     |   | QPPPPQHGPYQERIWVGEGWGEVGGGLR (PXD000036)               |
|                 |     |   | <u>CTSKAQRVHPQPSHORQ (N.A.)</u>                        |
|                 |     |   | CGKCVKMQLGSTLK (PXD000036)                             |
|                 |     |   | KQVSWIIFLKIGAGCQVHVGHDCSTLR (PXD000158)                |
|                 |     |   | MHYGRKQVSWIIFLKIGAGCQVHVGHDCS (PXD000079)              |
|                 |     |   | MQILGSTLKLFRHPPSQ (PXD000079)                          |
|                 |     |   | MQILGSTLKLFRHPPSQVTR (PXD000158)                       |
| ENSG00000145063 | 5   |   | QVSWIIFLKIGAGCQVHVGHDCSTLR (PXD000158)                 |
|                 |     |   | WTLSGSQQTGCVALT (PXD000451)                            |
|                 |     |   | WTLSGSQQTGCVALTVPSFPWVASRMHYGR (PXD000158)             |
|                 |     |   | WTLSGSQQTGCVALTVPSFPWVASRMHYGRK (PXD000451)            |
|                 |     |   | <u>LWGRHHLK (8653)</u>                                 |
|                 |     |   | <u>MHYGRKQVSWIIFLK (9327)</u>                          |
|                 |     |   | <u>MQILGSTLKLFR (8653)</u>                             |
|                 |     |   | DSLMLFTRQAGHFVEGSKAGR (PXD000036)                      |
|                 |     |   | GVSFLTFLHQSVPLGDRD (PXD000079)                         |
|                 |     |   | ICVITYTPALPIGLCTR (PXD000158)                          |
|                 |     |   | <u>CCLCLEQSPSWCHCLR (PXD000158, 8653, 8663, 8670)</u>  |
|                 |     |   | GVSFLTFLHQSVPLGDRDSLMLFTRQAGHFVEGSK (PXD000451)        |
|                 |     |   | HGLSMEIMWARMDVALR (human_proteome_map.peptidealtas)    |
| ENSG00000172927 | >10 | 3 | <u>ACLTLRHPTPHCSTWGLPLR (8659)</u>                     |
|                 |     |   | <u>DSLMLFTRQAGHFVEGSK (8666)</u>                       |
|                 |     |   | <u>GAQTGAGLSQEAEDVDVSR (8670)</u>                      |
|                 |     |   | <u>GVSFLTFLHQSVPLGDR (8653; 8658)</u>                  |
|                 |     |   | <u>MALRICVITYTPALPIGLCTR (8671)</u>                    |
|                 |     |   | <u>MDVALRSPGR (8658)</u>                               |
|                 |     |   | <u>VGVEQAISSCPEEVHGRHGLSMEIMWAR (8658)</u>             |
|                 |     |   | <u>VTDAPQGTLCGTGNR (8662)</u>                          |
|                 |     |   | ACGLPSECGSLVRARASPR (PXD000158)                        |
| ENSG00000177822 | >10 | 1 | GGDWCALSLVAPAASRHPPLSASEQR (PXD000158)                 |
|                 |     |   | HPPLSASEQRIPPTSTCTCTR (PXD000158)                      |
|                 |     |   | RGGDWCALSLVAPAASR (PXD000158)                          |

|                 |     |      |                                                     |
|-----------------|-----|------|-----------------------------------------------------|
|                 |     |      | <u>ACGLPSECGSLVRAR (8668)</u>                       |
|                 |     |      | <u>PGLPRPSPTCPWK (8653)</u>                         |
|                 |     |      | <u>RDPSGSFR (8668)</u>                              |
|                 |     |      | ALGSLSSLMPFRRSPAALTPGLLR (PXD000158)                |
|                 |     |      | <u>RSPAALTPGLLRPLAK (PXD000158, 288, 333)</u>       |
|                 |     |      | SPAALTPGLLRPLAK (PXD000158)                         |
|                 |     |      | VCSPMDAGRGLSLSALTQLR (PXD000158)                    |
| ENSG00000179522 | >10 | 7975 | WGGMLAWPPAAPARALGSLSSLMPFRR (PXD000158)             |
|                 |     |      | WGGMLAWPPAAPARALGSLSSLMPFRR (PXD000158)             |
|                 |     |      | <u>EQAPRVSAAPPGR (8665)</u>                         |
|                 |     |      | <u>FLTNKWGGMLAWPPAAPAR (8665)</u>                   |
|                 |     |      | <u>PQSSHLLPPVYPPAPLPPPKDVPLQ (8665)</u>             |
|                 |     |      | <u>MQICFLALWGGTMAVATSAETALRTSYASLK (8663)</u>       |
| ENSG00000215071 | 2   |      | <u>SPWGLDNILAPRDVSNYK (10531, 8657)</u>             |
|                 |     |      | RPEFLSRPSVQTEDAPSK (PXD000158)                      |
| ENSG00000182457 | >10 | 7    | <u>KETTTEQALPPALLGIR (8658)</u>                     |
|                 |     |      | <u>PEFLSRPSVQTEDAPSK (8653, 8663, 8669)</u>         |
|                 |     |      | MDTGSREAAFRDLPR (PXD000158)                         |
|                 |     |      | PADAQVSPEMSITHKEKENAHLK (PXD000158)                 |
|                 |     |      | DLPRKPADAQVSPEMSITHKEK (PXD000451)                  |
| ENSG00000174407 | 1   |      | <u>EMSITHKEKENAHLKEILLFVNAEAFSQPHSAPVCEG (8531)</u> |
|                 |     |      | <u>KPADAQVSPEMSITHK (8671)</u>                      |
|                 |     |      | <u>LLCYGWSHC (9328, 9342)</u>                       |
|                 |     |      | <u>FVDMEFLDOMILR (8662)</u>                         |
| ENSG00000203930 | >10 |      | <u>MPELEKFDMEFLDOMILR (8670)</u>                    |
|                 |     |      | HFLGTGKPPHPLGRSIP (PXD000079)                       |
| ENSG00000204091 | >10 |      | SIPVEPCPLPAFAEVDLLSLVPIKISSTPPSGSR (PXD000158)      |
|                 |     |      | <u>ISSTPPSGSR (8653)</u>                            |
|                 |     |      | AIHAAASISCGSIK (PXD000158)                          |
|                 |     |      | AIHAAASISCGSIKYVL (PXD000158)                       |
|                 |     |      | ILPRLSDSLMNYPSQSTAGAR (PXD000158)                   |
|                 |     |      | LSDSLMNYPSQSTAGAR (PXD000158)                       |
| ENSG00000204666 | 3   |      | MSLDGALKDLANGGLDLGSASHAK (PXD000158)                |
|                 |     |      | <u>APEGDGPLMADAGETLASGGPRVEHTK (8672)</u>           |
|                 |     |      | <u>SWLILASVCGVEKAIHAAASISCGSIKYVL (8671)</u>        |
|                 |     |      | <u>VEHTKSWLILASVCGVEK (8659; 8667)</u>              |
|                 |     |      | MPLPGTPGPVTTSPQTPTPR (PXD000036, PXD000158)         |
|                 |     |      | ILSGKGGGSARAVSK (PXD000158)                         |
| ENSG00000204674 | 1   |      | MPLPGTPGPVTTSPQTPTPRPLTTDWRILSGK (PXD000158)        |
|                 |     |      | SQEEAAPPSPRPQSR (PXD000158)                         |
|                 |     |      | <u>AHAQTTNPYWADTNTR (9299)</u>                      |

|                 |     |    |                                                    |
|-----------------|-----|----|----------------------------------------------------|
|                 |     |    | <u>ILSGKSGGSAR (8653)</u>                          |
|                 |     |    | <u>KSQEEAAPPSPRPQSR (9331)</u>                     |
|                 |     |    | <u>LRSSSSGNLLR (8653, 9333)</u>                    |
|                 |     |    | <u>PLTTDWRILSGK (8661, 8664)</u>                   |
|                 |     |    | <u>RILSGKSGGSARAVSK (8409)</u>                     |
|                 |     |    | AWQLSGSPSSYRQSGVK (PXD000158)                      |
|                 |     |    | AWQLSGSPSSYRQSGVKWTVK (PXD000158)                  |
|                 |     |    | CCDLPISPFLSQPR (PXD000158)                         |
| ENSG00000212736 | 1   |    | <u>MLNWLAQIQIAKSGR (PXD000158, 8659)</u>           |
|                 |     |    | MLNWLAQIQIAKSGRAWQLSGSPSSYR (PXD000158)            |
|                 |     |    | SGRAWQLSGSPSSYR (PXD000158)                        |
|                 |     |    | SGRAWQLSGSPSSYRQSGVK (PXD000158)                   |
|                 |     |    | VQLLLDGGTFQSLVR (PXD000158)                        |
|                 |     |    | ETWAWLSRTDTAWPGAPGVKQAR (PXD000158)                |
|                 |     |    | LGEEPPPLPYCDQAYGEELSIR (PXD000158)                 |
|                 |     |    | LLSMVPGPARPPGSCWDPTQCTR (PXD000036)                |
|                 |     |    | <u>MTVLEAVLEIQAITGSR (PXD000158, 8666)</u>         |
|                 |     |    | MTVLEAVLEIQAITGSRLISMVP (PXD000079)                |
| ENSG00000167747 | >10 | 40 | MTVLEAVLEIQAITGSRLISMVPGPAR (PXD000036)            |
|                 |     |    | PPGSCWDPTQCTRWLLSHTPR (PXD000036)                  |
|                 |     |    | WISGLPRASCRLGEEP (PXD000079)                       |
|                 |     |    | TVLEAVLEIQAITGSR (human_proteome_map.peptidealtas) |
|                 |     |    | <u>ASCRLGEEPPPLPYCDQAYGEELSIR (9335)</u>           |
|                 |     |    | <u>TDTAWPGAPGVKQAR (608)</u>                       |
|                 |     |    | ATETKENFQKESMVK (PXD000036, PXD000451)             |
| ENSG00000214112 | >10 |    | SEQLGTGGDQDWQLQHTR (PXD000158, PXD000451)          |
|                 |     |    | <u>LGROIQPPWPLAHAR (8665)</u>                      |
|                 |     |    | <u>AAAFLLHAAQGSSMPGAGMR (3669, 3674, 8653)</u>     |
|                 |     |    | <u>EVSLDSR (2674)</u>                              |
| ENSG00000214130 | 6   |    | <u>FCSLLAILASPNERALK (8660, 8663, 8669)</u>        |
|                 |     |    | <u>LAPPR (8653)</u>                                |
|                 |     |    | <u>MAMAHAGLCGWR (8653)</u>                         |
|                 |     |    | AFSQCSALTLHQRIHTGKK (PXD000036, PXD000158)         |
|                 |     |    | AFSTCTDLIEHQKTHAEEK (PXD000158)                    |
|                 |     |    | APTLFFIRESTLERNLMHVIVLK (PXD000036)                |
|                 |     |    | AQTSLNIREYTLVKSLIIAIVVR (PXD000158)                |
| ENSG00000118267 | >10 | 11 | CDACGKAFSTCTDLIEHQKTHAEEK (PXD000158)              |
|                 |     |    | CLVEDEILLNITEFIQVRNPMNVMNVGK (PXD000036)           |
|                 |     |    | CLVEDEILLNITEFIQVRNPMNVMNVGKPLVR (PXD000036)       |
|                 |     |    | IQTLLNIEGSTLERNPINVMSVGK (PXD000158)               |
|                 |     |    | NHMHVISVIKVLVKAQTSLNIR (PXD000158)                 |



---

NLMHVVIVLKALVAVQILLSIK (PXD000158, 8658)  
NLMHVVIVLKALVAVQILLSIKEYTLER (PXD000451)  
NPMNVMNVGKPLVRAPTLFFIR (PXD000036)  
NYYLCTQCSKSFQISDLIK (PXD000036)  
PSVGFQILLINEFTLER (PXD000158, 8658)  
SDLINHQKIHTGEKPYK (PXD000158)  
SLTHVISAIAKCLVEDEILLNITEFIQVRNPMNVMNVGK (PXD000036)  
THAEKPYQCVQCSR (PXD000158, 8658)  
VRKPLVCTPTLFSTRDTVPEKNLMNAVDY (PXD000079, 8665)  
VSVRIQTLLNIEGSTLERNPINVMSVGK (PXD000036, 1805)  
YYLCTQCSKSFQISDLIK (PXD000036, PXD000158, 1831)  
AFSTCTDLIEHQK (8658, 1789; 1828; 1830; 1831)  
CDACGKAFSTCTDLIEHQK (2027,8665)  
ECGKSFSR (1805,8660)  
HQRIHTGK (1831,8663)  
IHTGEKPY (1789, 1828, 1830, 1831, 8663; 8665; 8671)  
IHTGKK (2027,8658)  
NPIPVINVAK (8660)  
PLVCTPTLFSTRDTVPEKNLMNAVDY (8663)  
PNPCDECGKSFSR (8663, 8665, 8671)  
PSVRAQILFCIR (8658)  
PYKCDACGKAFSTCTDLIEHQK (9308)  
QKIHTGEK (76)  
SDLIKHOR (1824)

---

ENSG00000215458

4

AAGPGGTGQAECQVVVATHR (PXD000158)  
AAGPGGTGQAECQVVVATHRANLKPWDGR (PXD000036)  
DANTNRKGP MHGSDFPFR (PXD000158)  
DHQGSVEDTSLGGDAPADGVSPSPPLQGLG (PXD000079)  
DHQGSVEDTSLGGDAPADGVSPSPPLQGLGK (PXD000158, 146)  
ETRSGGPRGPRHSAP (PXD000079)  
KGPMHGSDFPRLCLHMSLWGSWGSR (PXD000036)  
LALQGPPGTILSLSSSPCLPPSHCDPG (PXD000079)  
LCLHMSLWGSWGSR (PXD000158)  
LCLHMSLWGSWGSRPPSPAHSREVAS (PXD000451)  
LLLQVSFQGAADGCSLR (PXD000036, PXD000158)  
PRDHQGSVEDTSLGGDAPADGVSPSPPLQGLG (PXD000079)  
RTEEGRLSTSSCASVSR (PXD000158)  
LSTSSCASVSR (8663)  
PMHGSDFPFR (8385; 8417)  
PPSPAHSREVAS (9340)  
RASRLALQGPPGTILSLSSSPC (8538)

---

|                 |     |   | <u>RSGGPR (8665)</u>                                     |
|-----------------|-----|---|----------------------------------------------------------|
| ENSG00000215494 | 1   |   | GDSEQSASKSKQAFPLLR (PXD000158)                           |
|                 |     |   | GGGQTGTFHMGLLPSR (PXD000158)                             |
|                 |     |   | GMEWPLSAWLESSSPAPCMPLWRR (PXD000158)                     |
|                 |     |   | HLTGVARGGGQTGTFHMGLLPSR (PXD000158)                      |
|                 |     |   | LTQRHLTGVARGGGQTGTFHMGLLPSR (PXD000158)                  |
|                 |     |   | MPSQPHLSACSVESPGAAAR (PXD000158)                         |
|                 |     |   | <u>MPSQPHLSACSVESPGAAARLTQR (PXD000158, 8669)</u>        |
|                 |     |   | QECAPVSALTTLTTMGR (PXD000158)                            |
|                 |     |   | QECAPVSALTTLTTMGRLFSVHWQIWGPCSPCIVYPK (PXD000451)        |
|                 |     |   | <u>KGMEWPLSAWLESSSPAPCMPLWR (8661; 8664; 8669; 8670)</u> |
|                 |     |   | <u>LFSVHWQIWGPCSPCIVYPKGDSEQSASK (8663; 8669; 8670)</u>  |
|                 |     |   | <u>NSFWESRPSPCR (8653)</u>                               |
| ENSG00000215848 | >10 |   | GDCVLEVMLHLLSSAQHSGETASSQR (PXD000158)                   |
|                 |     |   | GDCVLEVMLHLLSSAQHSGETASSQRPLTAPSTK (PXD000158)           |
|                 |     |   | GGREASALGLVPRLLR (PXD000158)                             |
|                 |     |   | KVLEESEWGNISMRR (PXD000158)                              |
|                 |     |   | VLEESEWGNISMRRER (PXD000158)                             |
|                 |     |   | <u>PLTAPSTK (76)</u>                                     |
| ENSG00000221953 | 2   |   | AAVGATPTTGPGTGEGALLGCGSGR (PXD000079)                    |
|                 |     |   | AGPDPTSPAPPAGPR (PXD000343)                              |
|                 |     |   | AGPDPTSPAPPAGPRSPGSLGPSAAPR (PXD000158)                  |
|                 |     |   | AGPDPTSPAPPAGPRSPGSLGPSAAPRTAR (PXD000158)               |
|                 |     |   | GAYELQGGASQDGPQAAV (PXD000079)                           |
|                 |     |   | GCRGHFRSLPAAASR (PXD000158)                              |
|                 |     |   | GQRGGSGGCQSTRAAER (PXD000036, PXD000158)                 |
|                 |     |   | KSSTSCGTWTASGLPSLGHLP (PXD000158)                        |
|                 |     |   | KSSTSCGTWTASGLPSLGHLP (PXD000036, PXD000158)             |
|                 |     |   | LLPAEVPPGAAAANFPERER (PXD000079)                         |
|                 |     |   | MGLCTLQPLGPPRKSSTSCGTWTASGLPSLGHLP (PXD000451)           |
|                 |     |   | RLLPAEVPPGAAAANFPERE (PXD000079)                         |
|                 |     |   | SLPAAASRSGSRTL (PXD000158, PXD000451)                    |
|                 |     |   | <u>SSTSCGTWTASGLPSLGHLP (PXD000158, 8671)</u>            |
|                 |     |   | <u>MGLCTLQPLGPPRKSSTSCGTWTASGLPSLGHLP (8667)</u>         |
| ENSG00000221891 | 3   | 4 | FSACPVSRSWCPERNFSGSIPAVTPPK (PXD000079)                  |
|                 |     |   | HGSVLLRHPTTTFVQQR (PXD000158)                            |
|                 |     |   | IVFSACPVSRSWCPER (PXD000036)                             |
|                 |     |   | IVFSACPVSRSWCPERNFSGSIPAVTPPK (PXD000158)                |
|                 |     |   | LPGHKSSEGPPGKVR (PXD000158)                              |
|                 |     |   | NFSGSIPAVTPPKLPGHKSSEGPPGK (PXD000036, PXD000451)        |
|                 |     |   | PGPSAWRASPAGWAGRAKLR (PXD000079)                         |

|                 |     |    |  |                                                                         |
|-----------------|-----|----|--|-------------------------------------------------------------------------|
|                 |     |    |  | PYTLTGGRHGSVSLLRHPGTTTFVQQR (PXD000158)                                 |
|                 |     |    |  | RNFSGSIPAVTPPKLPGHKSSEGPPGK (PXD000079)                                 |
|                 |     |    |  | <u>GSCPLLPGPSAWR (8666)</u>                                             |
|                 |     |    |  | <u>MEGCAVR (8653)</u>                                                   |
|                 |     |    |  | <u>MEGCAVRRGSCPLLPGPSAWR (9297, 9304, 9305, 9306, 9334, 9335, 9336,</u> |
|                 |     |    |  | <u>9337, 9338)</u>                                                      |
|                 |     |    |  | <u>SWCRASGLPNR (9353)</u>                                               |
|                 |     |    |  | MNTYTRSASFPTKTFPLAQNR (PXD000036, PXD000158)                            |
|                 |     |    |  | AECTAKLAGDGHARLASAFLHR (PXD000158)                                      |
|                 |     |    |  | <u>DSLPPGLSLTLGKSPK (PXD000158, 1789)</u>                               |
|                 |     |    |  | LGEGGSAPALGPSRRGR (PXD000158)                                           |
|                 |     |    |  | PRLGEGGSAPALGPSR (PXD000158)                                            |
|                 |     |    |  | TSHPTTTSKLYLGR (PXD000158)                                              |
|                 |     |    |  | VSEGLRDSLPPGLSLTLGKSPK (PXD000158)                                      |
|                 |     |    |  | <u>AALPPPLGTCRPR (1789)</u>                                             |
| ENSG00000221899 | 2   |    |  | <u>DSLPPGLSLTLGK (2001; 9330)</u>                                       |
|                 |     |    |  | <u>LASAFLHR (10049)</u>                                                 |
|                 |     |    |  | <u>MNTYTRSASFPTK (1789)</u>                                             |
|                 |     |    |  | <u>NTYTRSASFPTK (1789)</u>                                              |
|                 |     |    |  | <u>RAALPPPLGTCR (8653)</u>                                              |
|                 |     |    |  | <u>RAALPPPLGTCRPR (1789)</u>                                            |
|                 |     |    |  | <u>VSEGLRDSLPPGLSLTLGK (1789)</u>                                       |
|                 |     |    |  | <u>YLGRPSR (96)</u>                                                     |
|                 |     |    |  | <u>YLGRPSRR (9333)</u>                                                  |
|                 |     |    |  | RCHHHHEATGAASGAAAGGPGAGCVGLCRLAL (PXD000079)                            |
|                 |     |    |  | FGGRLPVSVEAALPYWVPL (PXD000079)                                         |
| ENSG00000260456 | >10 | 16 |  | KEVCLPRHSMHPGPWAICC (PXD000079)                                         |
|                 |     |    |  | LALTPSAQDGRNSTFQTYKK (PXD000158)                                        |
|                 |     |    |  | LPVSVEAALPYWVPLSLR (PXD000158)                                          |
|                 |     |    |  | NSTFQTYKKEVCLPR (PXD000451)                                             |
|                 |     |    |  | YPRETETIWSHPYVVEGSHK (PXD000036)                                        |
|                 |     |    |  | EKGVAQRQVPTTGTHSFFHCTSEGK (PXD000036)                                   |
|                 |     |    |  | IHTPEQGSPSLGQNSWGNRKEK (PXD000036)                                      |
|                 |     |    |  | SLHGCLAAMAPSITSEDSSPSQRDK (PXD000079)                                   |
|                 |     |    |  | EKGVAQRQVPTTGTHSFFHCT (PXD000079)                                       |
| ENSG00000149443 | 9   |    |  | ETETIWSHPYVVEGSHK (PXD000158, PXD000451)                                |
|                 |     |    |  | GVAQRQVPTTGTHSFFHCTSEGK (PXD000158)                                     |
|                 |     |    |  | IHTPEQGSPSLGQNSWGNR (PXD000158)                                         |
|                 |     |    |  | KRSQGLHWSHWQGLNHMSIR                                                    |
|                 |     |    |  | (PXD000158, human_proteome_map.peptidealtas)                            |
|                 |     |    |  | QVPTTGTHSFFHCTSEGKKEK (PXD000158)                                       |

|                 |     |    |                                                         |
|-----------------|-----|----|---------------------------------------------------------|
|                 |     |    | SQGLHWSHWQGLNHMSIR (PXD000158)                          |
| ENSG00000167159 | 1   |    | AASGDSQEGMRRGYEER (PXD000158)                           |
|                 |     |    | GDKEELTPQKCSEPQSSK (PXD000158)                          |
| ENSG00000008517 | >10 | 10 | QFQSFCCSLSELFMSSFQSYGAPRGDKEELTPQK (PXD000158)          |
|                 |     |    | SYGAPRGDKEELTPQK (PXD000158)                            |
|                 |     |    | SKINPPPWAPACLPGGFPACLPAPK (PXD000036)                   |
|                 |     |    | SKINPPPWAPACLPGGFPACLPAPKSSTDSASSCFK (PXD000036)        |
|                 |     |    | GRSKINPPPWAPACLPGGFPACLPAPK (PXD000036)                 |
| ENSG00000183250 | 8   | 1  | MGWDCRRTTVENPSPIRN (PXD000079)                          |
|                 |     |    | MGWDCRRTTVENPSPIRNC (PXD000079)                         |
|                 |     |    | EFSDDLIPGAGAMG (PXD000158)                              |
|                 |     |    | MGWDCRRTTVENPSPIR (PXD000158, PXD000451)                |
|                 |     |    | MLANHALSTPHCACSPAPAPR (PXD000036)                       |
|                 |     |    | PTLRMLANHALSTPHCACSPAPAPR (PXD000036, PXD000158)        |
|                 |     |    | SHAPQPPAHLGLGPGCFPAVAVVVPVPGSRAHR (PXD000036)           |
|                 |     |    | GDPPIPPRRSGVLAR (PXD000079)                             |
| ENSG00000244291 | 4   | 73 | MLANHALSTPHCACSP (PXD000079)                            |
|                 |     |    | MLANHALSTPHCACSPAPA (PXD000079)                         |
|                 |     |    | MLASPARPTLRMLANHALSTPHCACSPAPAPR (PXD000158, PXD000451) |
|                 |     |    | SHAPQPPAHLGLGPGCFPAVAVVVPVPGSR (PXD000158)              |
|                 |     |    | CVPVEARAAGVFGDRLAGVFGSR (PXD000158)                     |
|                 |     |    | MSMAACPEAPEPSFLR (PXD000036)                            |
| ENSG00000205913 | 5   |    | EVPSSPASTQWHRPCNFR (PXD000036)                          |
|                 |     |    | MSMAACPEAPEPSFLREVPSASTQWHR (PXD000158)                 |
|                 |     |    | NLVWRDVS LGQTSRTPR (PXD000158)                          |
|                 |     |    | MFPGLRGPAAQVLENECGSLGRAAEGR (PXD000036)                 |
|                 |     |    | MPAVFMLASSALQCGRGVPR (PXD000036)                        |
|                 |     |    | MPAVFMLASSALQCGRGVPRFPR (PXD000036)                     |
|                 |     |    | GNNASGMGGHRMFPGLR (PXD000036, PXD000158)                |
|                 |     |    | QERSHWHPRGNNASGMGGHRMFPGLR (PXD000079)                  |
|                 |     |    | RGNNASGMGGHRMFPGLR (PXD000079)                          |
|                 |     |    | AEKVGNTSVIPATSRQAAL (PXD000079)                         |
| ENSG00000221990 | 2   | 14 | MLASSALQCGRGVPRFPR (PXD000079)                          |
|                 |     |    | MPAVFMLASSALQCGRGV (PXD000079)                          |
|                 |     |    | AEKVGNTSVIPATSR (PXD000158)                             |
|                 |     |    | FPRTEVGAGHSVNEETK (PXD000036, PXD000158)                |
|                 |     |    | MPAVFMLASSALQCGR (PXD000158)                            |
|                 |     |    | SHWHPRGNNASGMGGHR (PXD000158)                           |
|                 |     |    | TEVGAGHSVNEETKAEK (PXD000158)                           |
|                 |     |    | TEVGAGHSVNEETKAEKVGNTSVIPATSR (PXD000036, PXD000158)    |

\* peptides with underline were previously reported.
