# Supplementary material for: Emergence, Retention and Selection: A Trilogy of Origination for Functional De Novo Proteins from Ancestral LncRNAs in Primates
Source: PubMed Central journal article supplement (PMC4503675; doi:10.1371/journal.pgen.1005391), 2015-07-15
Supplement: pgen.1005391.s012.pdf [file pgen.1005391.s012.pdf]

**S4 Table. Statistics of polymorphic sites in rhesus macaque**

|                   | <b>Coding Genes<br/>(RefSeq)</b> | <b>Coding Genes<br/>(Ensembl)</b> | <b>LncRNAs<br/>(This Study)</b> | <b>MiRNAs<br/>(miRBase)</b> | <b>Whole<br/>Genome</b> |
|-------------------|----------------------------------|-----------------------------------|---------------------------------|-----------------------------|-------------------------|
| <b>Length</b>     | 11,141,075                       | 33,860,826                        | 3,543,258                       | 43,036                      | 2,864,106,071           |
| <b>SNP Number</b> | 103,157                          | 339,282                           | 59,856                          | 638                         | 44,356,394              |
