# Supplementary material for: Emergence, Retention and Selection: A Trilogy of Origination for Functional De Novo Proteins from Ancestral LncRNAs in Primates
Source: PubMed Central journal article supplement (PMC4503675; doi:10.1371/journal.pgen.1005391), 2015-07-15
Supplement: pgen.1005391.s013.pdf [file pgen.1005391.s013.pdf]

**S5 Table. Information of 67 human individuals with whole genome re-sequencing data**

| <b>Sample ID</b> | <b>Population</b> | <b>Sex</b> | <b>Coverage</b> |
|------------------|-------------------|------------|-----------------|
| HG02095          | ACB               | Female     | 10.78           |
| HG02107          | ACB               | Male       | 40.28           |
| HG02332          | ACB               | Male       | 17.82           |
| HG02419          | ACB               | Female     | 13.21           |
| HG02484          | ACB               | Male       | 12.5            |
| HG02508          | ACB               | Female     | 11.04           |
| HG02537          | ACB               | Female     | 17.45           |
| HG02283          | ACB               | Male       | 17.65           |
| HG02479          | ACB               | Female     | 9.78            |
| HG02485          | ACB               | Female     | 10.64           |
| NA19904          | ASW               | Male       | 8.91            |
| NA19909          | ASW               | Female     | 6.64            |
| NA19921          | ASW               | Female     | 14.94           |
| NA19923          | ASW               | Female     | 10.39           |
| NA19984          | ASW               | Male       | 11.16           |
| NA19914          | ASW               | Female     | 17.84           |
| NA12044          | CEU               | Female     | 13.96           |
| NA12812          | CEU               | Male       | 10.38           |
| NA12873          | CEU               | Female     | 9.73            |
| NA12874          | CEU               | Male       | 11.27           |
| NA12872          | CEU               | Male       | 9.64            |
| NA12414          | CEU               | Female     | 12.45           |
| NA18525          | CHB               | Female     | 12.35           |
| NA18647          | CHB               | Male       | 9.99            |
| NA18747          | CHB               | Male       | 9.93            |
| NA18749          | CHB               | Male       | 9.81            |
| HG00097          | GBR               | Female     | 10.26           |
| NA21106          | GIH               | Female     | 10.54           |
| NA21119          | GIH               | Male       | 10.6            |
| NA18957          | JPT               | Female     | 9.13            |
| NA18960          | JPT               | Male       | 13.44           |
| NA18968          | JPT               | Female     | 11.07           |
| NA18971          | JPT               | Male       | 12.55           |
| NA18974          | JPT               | Male       | 12.76           |
| NA18975          | JPT               | Female     | 10.69           |
| NA18976          | JPT               | Female     | 13.52           |
| NA18998          | JPT               | Female     | 10.83           |
| NA19001          | JPT               | Female     | 9.89            |
| HG02141          | KHV               | Male       | 10.47           |
| NA19038          | LWK               | Female     | 10.62           |

|                |     |        |       |
|----------------|-----|--------|-------|
| <b>NA19307</b> | LWK | Male   | 11.68 |
| <b>NA19310</b> | LWK | Female | 10.18 |
| <b>NA19031</b> | LWK | Male   | 10.56 |
| <b>NA19308</b> | LWK | Male   | 11.76 |
| <b>NA19740</b> | MXL | Female | 9.9   |
| <b>HG02089</b> | PEL | Female | 11.02 |
| <b>HG02104</b> | PEL | Male   | 11.09 |
| <b>HG02301</b> | PEL | Female | 11.9  |
| <b>HG02286</b> | PEL | Female | 10.22 |
| <b>HG00734</b> | PUR | Female | 10.29 |
| <b>HG01049</b> | PUR | Female | 7.62  |
| <b>HG01075</b> | PUR | Male   | 17.01 |
| <b>HG01167</b> | PUR | Male   | 17.28 |
| <b>HG01176</b> | PUR | Male   | 17.28 |
| <b>HG00732</b> | PUR | Female | 30.95 |
| <b>NA18504</b> | YRI | Male   | 12.19 |
| <b>NA18856</b> | YRI | Male   | 10.34 |
| <b>NA18868</b> | YRI | Male   | 11.16 |
| <b>NA19095</b> | YRI | Female | 9.33  |
| <b>NA19119</b> | YRI | Male   | 12.56 |
| <b>NA19131</b> | YRI | Female | 11.54 |
| <b>NA19152</b> | YRI | Female | 13.64 |
| <b>NA19171</b> | YRI | Male   | 10.81 |
| <b>NA19184</b> | YRI | Male   | 10.02 |
| <b>NA19204</b> | YRI | Female | 11.33 |
| <b>NA19146</b> | YRI | Male   | 10.67 |
| <b>NA20534</b> | TSI | Male   | 8.46  |

---
