# Supplementary material for: Emergence, Retention and Selection: A Trilogy of Origination for Functional De Novo Proteins from Ancestral LncRNAs in Primates
Source: PubMed Central journal article supplement (PMC4503675; doi:10.1371/journal.pgen.1005391), 2015-07-15
Supplement: pgen.1005391.s014.pdf [file pgen.1005391.s014.pdf]

**S6 Table. Statistics of targeted sequencing in 82 macaque animals**

| <b>ID</b>     | <b>Total Reads</b> | <b>Mapped Reads</b> | <b>Percentage</b> | <b>Uniquely Mapped Reads</b> | <b>Percentage</b> |
|---------------|--------------------|---------------------|-------------------|------------------------------|-------------------|
| <b>00005</b>  | 3,967,630          | 3,493,397           | 0.88              | 3,172,619                    | 0.80              |
| <b>00203</b>  | 2,902,460          | 2,552,595           | 0.88              | 2,283,422                    | 0.89              |
| <b>00213</b>  | 3,346,736          | 2,946,690           | 0.88              | 2,662,072                    | 0.90              |
| <b>01319</b>  | 3,615,358          | 3,165,257           | 0.88              | 2,877,326                    | 0.91              |
| <b>89633</b>  | 3,334,400          | 2,898,002           | 0.87              | 2,648,849                    | 0.91              |
| <b>93003</b>  | 3,255,580          | 2,859,293           | 0.88              | 2,601,769                    | 0.91              |
| <b>930189</b> | 3,687,168          | 3,077,532           | 0.83              | 2,844,214                    | 0.92              |
| <b>930433</b> | 2,807,842          | 2,455,930           | 0.87              | 2,218,608                    | 0.90              |
| <b>96637</b>  | 3,007,048          | 2,467,821           | 0.82              | 2,261,346                    | 0.92              |
| <b>97111</b>  | 3,864,180          | 3,228,185           | 0.84              | 2,987,302                    | 0.93              |
| <b>97115</b>  | 3,230,670          | 2,806,632           | 0.87              | 2,548,264                    | 0.91              |
| <b>97601</b>  | 3,825,904          | 3,342,340           | 0.87              | 2,994,546                    | 0.90              |
| <b>00117</b>  | 1,936,186          | 1,508,141           | 0.78              | 1,386,288                    | 0.92              |
| <b>001931</b> | 2,996,308          | 2,329,887           | 0.78              | 2,147,724                    | 0.92              |
| <b>00601</b>  | 2,446,396          | 2,017,023           | 0.82              | 1,890,488                    | 0.94              |
| <b>01039</b>  | 2,876,064          | 2,307,959           | 0.80              | 2,142,556                    | 0.93              |
| <b>90627</b>  | 2,120,884          | 1,713,951           | 0.81              | 1,585,474                    | 0.93              |
| <b>93617</b>  | 2,310,886          | 1,829,410           | 0.79              | 1,696,354                    | 0.93              |
| <b>93703</b>  | 2,247,678          | 1,781,817           | 0.79              | 1,638,244                    | 0.92              |
| <b>94639</b>  | 1,985,094          | 1,427,599           | 0.72              | 1,317,409                    | 0.92              |
| <b>94715</b>  | 2,609,252          | 2,112,639           | 0.81              | 1,951,751                    | 0.92              |
| <b>96603</b>  | 1,717,350          | 1,368,420           | 0.80              | 1,260,959                    | 0.92              |
| <b>97207</b>  | 1,690,180          | 1,345,900           | 0.80              | 1,243,318                    | 0.92              |
| <b>97633</b>  | 2,435,508          | 1,908,940           | 0.78              | 1,759,027                    | 0.92              |
| <b>98205</b>  | 2,166,608          | 1,725,912           | 0.80              | 1,596,058                    | 0.92              |
| <b>98723</b>  | 2,079,812          | 1,514,537           | 0.73              | 1,390,059                    | 0.92              |
| <b>98743</b>  | 1,685,634          | 1,391,001           | 0.83              | 1,291,316                    | 0.93              |
| <b>99105</b>  | 2,445,736          | 2,023,720           | 0.83              | 1,870,347                    | 0.92              |
| <b>10187</b>  | 1,941,136          | 1,483,225           | 0.76              | 1,356,659                    | 0.91              |
| <b>870437</b> | 2,906,412          | 2,176,409           | 0.75              | 1,980,973                    | 0.91              |
| <b>900629</b> | 3,009,866          | 2,345,362           | 0.78              | 2,162,773                    | 0.92              |
| <b>900681</b> | 1,838,262          | 1,409,905           | 0.77              | 1,292,936                    | 0.92              |
| <b>91685</b>  | 2,042,422          | 1,543,183           | 0.76              | 1,410,387                    | 0.91              |
| <b>920853</b> | 3,026,874          | 2,291,763           | 0.76              | 2,103,438                    | 0.92              |
| <b>93009</b>  | 2,480,674          | 1,856,959           | 0.75              | 1,696,468                    | 0.91              |
| <b>930629</b> | 2,899,280          | 2,288,576           | 0.79              | 2,107,339                    | 0.92              |
| <b>93661</b>  | 2,191,744          | 1,689,596           | 0.77              | 1,552,145                    | 0.92              |
| <b>940869</b> | 2,602,128          | 2,100,929           | 0.81              | 1,932,527                    | 0.92              |
| <b>96619</b>  | 3,190,632          | 2,464,213           | 0.77              | 2,269,020                    | 0.92              |
| <b>98209</b>  | 3,110,808          | 2,309,528           | 0.74              | 2,118,886                    | 0.92              |

|               |             |             |      |             |      |
|---------------|-------------|-------------|------|-------------|------|
| <b>99003</b>  | 2,824,394   | 2,140,918   | 0.76 | 1,960,503   | 0.92 |
| <b>99071</b>  | 3,006,116   | 2,251,283   | 0.75 | 2,059,135   | 0.91 |
| <b>99113</b>  | 2,093,778   | 1,542,484   | 0.74 | 1,401,820   | 0.91 |
| <b>00251</b>  | 1,692,044   | 1,252,288   | 0.74 | 1,134,843   | 0.91 |
| <b>010181</b> | 2,264,524   | 1,682,030   | 0.74 | 1,536,597   | 0.91 |
| <b>01323</b>  | 2,104,338   | 1,574,683   | 0.75 | 1,431,340   | 0.91 |
| <b>930599</b> | 2,538,342   | 1,862,743   | 0.73 | 1,711,749   | 0.92 |
| <b>95601</b>  | 2,611,720   | 1,953,733   | 0.75 | 1,779,484   | 0.91 |
| <b>95677</b>  | 2,242,624   | 1,703,194   | 0.76 | 1,558,492   | 0.92 |
| <b>960123</b> | 2,347,346   | 1,746,902   | 0.74 | 1,592,714   | 0.91 |
| <b>97683</b>  | 2,622,344   | 1,946,206   | 0.74 | 1,771,423   | 0.91 |
| <b>98213</b>  | 1,676,132   | 1,246,892   | 0.74 | 1,133,964   | 0.91 |
| <b>98369</b>  | 2,051,034   | 1,548,186   | 0.75 | 1,418,688   | 0.92 |
| <b>98675</b>  | 1,948,208   | 1,448,337   | 0.74 | 1,324,923   | 0.91 |
| <b>99019</b>  | 2,045,396   | 1,483,868   | 0.73 | 1,357,644   | 0.91 |
| <b>99055</b>  | 2,439,512   | 1,835,777   | 0.75 | 1,683,198   | 0.92 |
| <b>99741</b>  | 1,676,558   | 1,268,032   | 0.76 | 1,151,882   | 0.91 |
| <b>840555</b> | 2,368,254   | 1,811,538   | 0.76 | 1,673,449   | 0.92 |
| <b>850745</b> | 2,281,744   | 1,725,307   | 0.76 | 1,575,147   | 0.91 |
| <b>900405</b> | 2,331,038   | 1,807,203   | 0.78 | 1,667,362   | 0.92 |
| <b>910371</b> | 2,422,998   | 1,807,414   | 0.75 | 1,659,654   | 0.92 |
| <b>920413</b> | 2,576,346   | 1,943,167   | 0.75 | 1,789,083   | 0.92 |
| <b>93007</b>  | 1,662,204   | 1,262,134   | 0.76 | 1,158,879   | 0.92 |
| <b>93683</b>  | 1,980,990   | 1,492,241   | 0.75 | 1,367,582   | 0.92 |
| <b>94667</b>  | 2,459,184   | 1,882,834   | 0.77 | 1,740,114   | 0.92 |
| <b>960861</b> | 2,501,580   | 1,864,396   | 0.75 | 1,701,180   | 0.91 |
| <b>96697</b>  | 2,673,052   | 2,131,688   | 0.80 | 1,975,016   | 0.93 |
| <b>980993</b> | 2,494,096   | 1,881,584   | 0.75 | 1,726,037   | 0.92 |
| <b>99059</b>  | 2,033,558   | 1,523,642   | 0.75 | 1,398,853   | 0.92 |
| <b>991043</b> | 2,295,734   | 1,707,648   | 0.74 | 1,560,410   | 0.91 |
| <b>99263</b>  | 2,260,332   | 1,690,204   | 0.75 | 1,545,354   | 0.91 |
| <b>900593</b> | 3,892,048   | 3,152,088   | 0.81 | 2,925,644   | 0.93 |
| <b>900759</b> | 2,985,770   | 2,513,876   | 0.84 | 2,316,709   | 0.92 |
| <b>910137</b> | 3,316,194   | 2,802,118   | 0.84 | 2,598,734   | 0.93 |
| <b>920653</b> | 3,036,388   | 2,526,636   | 0.83 | 2,330,333   | 0.92 |
| <b>99013</b>  | 4,233,824   | 3,142,547   | 0.74 | 2,942,323   | 0.94 |
| <b>99033</b>  | 4,263,558   | 3,389,478   | 0.79 | 3,171,206   | 0.94 |
| <b>010399</b> | 5,543,420   | 3,950,012   | 0.71 | 3,599,965   | 0.91 |
| <b>02119</b>  | 4,192,580   | 3,117,326   | 0.74 | 2,859,913   | 0.92 |
| <b>02313</b>  | 4,348,838   | 3,306,464   | 0.76 | 3,006,325   | 0.91 |
| <b>880423</b> | 4,152,862   | 3,075,796   | 0.74 | 2,806,304   | 0.91 |
| <b>980769</b> | 4,307,020   | 3,232,228   | 0.75 | 2,940,933   | 0.91 |
| <b>Total</b>  | 222,632,812 | 174,787,303 | 0.79 | 160,296,168 | 0.92 |

---
